# Supplementary material for: Lewis acid Ni/Al-MCM-41 catalysts for H2-free deoxygenation of Reutealis trisperma oil to biofuels
Source: Royal Society of Chemistry journal article supplement (doi:10.1039/d1ra03145g), 2021-01-01
Supplement: d1ra03145g1.pdf [file d1ra03145g1.pdf]

### Supplementary Information

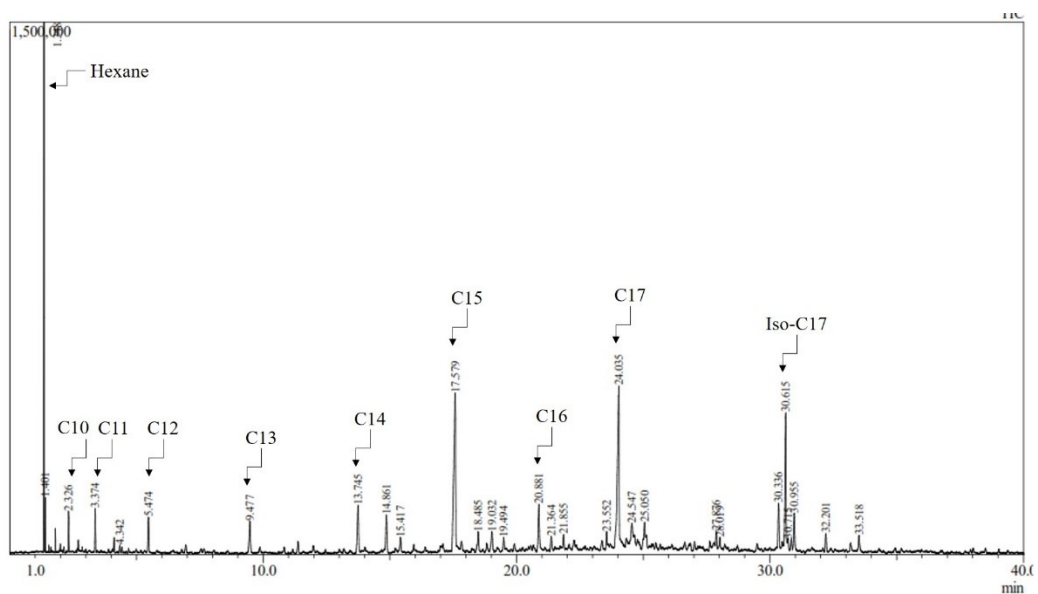

Fig. S1 GC-MS spectra of deoxygenated liquid product using 10%Ni/Al-MCM-41 catalyst

**Table S1. Composition of liquid products of *Reutealis trisperma* oil deoxygenation using Ni/Al-MCM-41 by GC-MS analysis**

| Retention Time | Compound name                 | Selectivity (%) |                |                 |                 |                 |
|----------------|-------------------------------|-----------------|----------------|-----------------|-----------------|-----------------|
|                |                               | Al-MCM-41       | 5%Ni/Al-MCM-41 | 10%Ni/Al-MCM-41 | 15%Ni/Al-MCM-41 | 20%Ni/Al-MCM-41 |
| Alkane         |                               |                 |                |                 |                 |                 |
| 1.539          | Octane                        | 0.57            | 0.11           | -               | -               | 0.47            |
| 1.801          | Nonane                        | 1.98            | 0.27           | -               | 0.25            | 1.61            |
| 2.326          | Decane                        | 3.48            | 0.50           | 1.17            | 0.48            | 2.31            |
| 3.388          | Undecane                      | 4.74            | 0.83           | 1.90            | 0.74            | 2.61            |
| 5.512          | Dodecane                      | 6.26            | 0.87           | 2.42            | 1.02            | 2.30            |
| 9.546          | Tridecane                     | 10.72           | 3.93           | 4.21            | 2.1             | 4.37            |
| 13.802         | Tetradecane                   | 8.72            | 5.36           | 6.13            | 4.99            | 7.45            |
| 17.589         | Pentadecane                   | 17.03           | 32.09          | 20.95           | 19.85           | 39.52           |
| 20.895         | Hexadecane                    | 0.90            | 5.83           | 5.78            | 6.58            | -               |
| 23.979         | Heptadecane                   | 2.81            | 7.64           | 21.34           | 19.98           | -               |
| 26.802         | Octadecane                    | -               | 0.82           | -               | 3.00            | -               |
| 30.615         | Iso-heptadecane               | 1.42            | 11.85          | 20.53           | 18.71           | 4.87            |
| Alkene         |                               |                 |                |                 |                 |                 |
| 1.639          | 1-Octene                      | -               | 0.26           | -               | -               | 0.21            |
| 1.994          | 1-Nonene                      | 1.01            | 0.45           | -               | -               | 0.66            |
| 2.711          | 1-Decene                      | 1.71            | 0.64           | -               | -               | 1.43            |
| 4.141          | 1-Dodecene                    | 4.29            | 2.86           | -               | 0.69            | 2.00            |
| 4.45           | Undecene                      | -               | 0.63           | -               | -               | -               |
| 10.64          | Tetradecene                   | -               | 1.14           | -               | -               | -               |
| 11.421         | 1-Tridecene                   | 1.93            | 1.72           | -               | 0.50            | 0.52            |
| 18.814         | 3-Octadecene                  | -               | -              | -               | 0.67            | -               |
| 19.031         | 1-Hexadecene                  | -               | 0.96           | 1.22            | -               | -               |
| 19.494         | 1-Pentadecene                 | -               | 0.35           | 0.85            | 0.94            | -               |
| 24.769         | 1-Heptadecene                 | -               | 2.21           | 2.93            | 6.75            | -               |
| Cyclic         |                               |                 |                |                 |                 |                 |
| 1.396          | Methylcyclopentane            | 0.40            | 0.64           | 1.06            | 0.58            | 3.66            |
| 2.245          | Propylcyclohexane             | -               | -              | -               | -               | 0.43            |
| 4.447          | Cyclopropane, 1,2-dibutyl     | 0.52            | -              | -               | -               | 2.53            |
| 13.036         | Cyclohexane, (4-methylpentyl) | -               | 0.33           | -               | -               | -               |

| Retention Time   | Compound name                                           | Selectivity (%) |                |                 |                 |                 |
|------------------|---------------------------------------------------------|-----------------|----------------|-----------------|-----------------|-----------------|
|                  |                                                         | Al-MCM-41       | 5%Ni/Al-MCM-41 | 10%Ni/Al-MCM-41 | 15%Ni/Al-MCM-41 | 20%Ni/Al-MCM-41 |
| 20.655           | Undecylcyclohexane                                      | -               | 0.20           | -               | 0.40            | -               |
| 23.363           | Cyclodecane-octyl                                       | -               | -              | -               | 0.85            | -               |
| 23.689           | Cyclohexane, 1,2-dimethyl-3-pentyl-4-propyl-            | -               | -              | -               | 0.25            | -               |
| 24.335           | Cyclohexane, hexaethyl                                  | -               | -              | -               | 1.05            | -               |
| 25.398           | Cyclooctane,tetradecanyl                                | -               | -              | -               | 0.44            | -               |
| 25.492           | Cyclohexane, 1,2-dimethyl-3-pentyl-4-propyl-            | -               | -              | -               | 0.54            | -               |
| 27.014           | Undecylcyclohexane                                      | -               | -              | -               | 0.60            | -               |
| <b>Aromatics</b> |                                                         |                 |                |                 |                 |                 |
| 5.192            | o-xylene                                                | 0.66            | 0.23           | -               | -               | -               |
| 9.919            | n-butylbenzene                                          | 1.09            | 0.81           | -               | -               | 0.72            |
| 10.871           | 2-propyltoluene                                         | 1.17            | 0.86           | -               | -               | 0.81            |
| 14.058           | Pentylbenzene                                           | 0.78            | 0.45           | -               | -               | -               |
| 14.846           | Benzene, (1,2-dimethylpropyl)                           | -               | -              | -               | -               | 6.18            |
| 14.902           | 2-Phenylpentane                                         | 8.23            | 2.95           | 3.12            | 1.46            | -               |
| 17.066           | Benzene, 1-ethyl-4-(2-methylpropyl)-                    | -               | 0.65           | -               | 0.57            | -               |
| 17.133           | p-cymene                                                | 1.95            | -              | -               | -               | -               |
| 17.863           | 1-Phenylhexane                                          | 2.46            | 1.39           | -               | 0.34            | 3.12            |
| 18.475           | Benzene, (1,3-dimethylbutyl)                            | -               | -              | -               | -               | 1.85            |
| 18.523           | 2-Methyl-4-phenylpentane                                | 3.36            | 2.50           | 1.25            | 1.36            | -               |
| 21.884           | 1-Methyl-2-N-hexylbenzene                               | 1.52            | -              | 0.98            | 0.61            | 0.85            |
| 26.628           | Benzene, 1,1'-(1,1,3,3-tetramethyl-1,3-propanediyl)bis- | -               | -              | -               | 0.54            | -               |
| 28.019           | Hexan,2-phenyl-3-propyl                                 | -               | -              | 0.74            | 0.81            | 0.94            |
| 30.715           | 2-Naphthalenamine, 1,2,3,4-tetrahydro-N-(1-methylethyl) | -               | -              | 0.93            | -               | -               |
| 32.201           | Benzene, 1,1'-(1,1,3,3-tetramethyl-1,3-propanediyl)bis- | -               | -              | 1.62            | -               | -               |

| Retention Time  | Compound name                                | Selectivity (%) |                |                 |                 |                 |
|-----------------|----------------------------------------------|-----------------|----------------|-----------------|-----------------|-----------------|
|                 |                                              | Al-MCM-41       | 5%Ni/Al-MCM-41 | 10%Ni/Al-MCM-41 | 15%Ni/Al-MCM-41 | 20%Ni/Al-MCM-41 |
| Carboxylic acid |                                              |                 |                |                 |                 |                 |
| 24.15           | Benzenepentanoic acid                        | -               | -              | -               | 0.26            | -               |
| 25.075          | Butanoic acid                                | 3.06            | -              | -               | -               | -               |
| 28.051          | Hexanoic acid                                | 2.33            | 1.51           | -               | -               | -               |
| 30.846          | Heptanoic acid                               | 2.38            | 1.64           | -               | -               | 1.28            |
| 33.492          | Octanoic acid                                | 1.50            | 1.56           | -               | -               | 1.66            |
| 35.97           | Nonanoic acid                                | -               | 0.57           | -               | -               | 1.21            |
| Alcohol         |                                              |                 |                |                 |                 |                 |
| 14.81           | 1-Dodecanol                                  | -               | 0.59           | -               | -               | -               |
| 15.403          | 1-Tetradecanol                               | -               | -              | -               | -               | 0.58            |
| 15.417          | 1-Tridecanol                                 | -               | 0.08           | 0.84            | 0.56            | -               |
| 19.014          | Pentadecanol                                 | -               | 0.31           | -               | 1.05            | -               |
| 25.038          | 2-phenyl-1-propanol                          | -               | -              | -               | -               | 3.82            |
| Ketone          |                                              |                 |                |                 |                 |                 |
| 18.465          | Hydroxybenzophenon                           | -               | 0.57           | -               | -               | -               |
| 25.16           | 2,2-dimethyl-5-phenyl-hexone                 | 0.99            | -              | -               | -               | -               |
| 30.7            | 5,9,9-Trimethylspiro[3.6]deca-5,7-dien-1-one | -               | -              | -               | 0.45            | -               |
| Aldehyde        |                                              |                 |                |                 |                 |                 |
| 18.364          | 9-Octadecenal                                | -               | 0.81           | -               | -               | -               |
